# Supplementary material
Source: PubMed Central journal article supplement (PMC4369159)
Supplement: NIHMS633652-supplement-10803_2014_2262_MOESM1_ESM.pdf [file NIHMS633652-supplement-10803_2014_2262_MOESM1_ESM.pdf]

## Cumulative incidence by age 8 of autism spectrum disorders and other disabilities in the Israeli population born 1992-2009, by birth cohort and population group

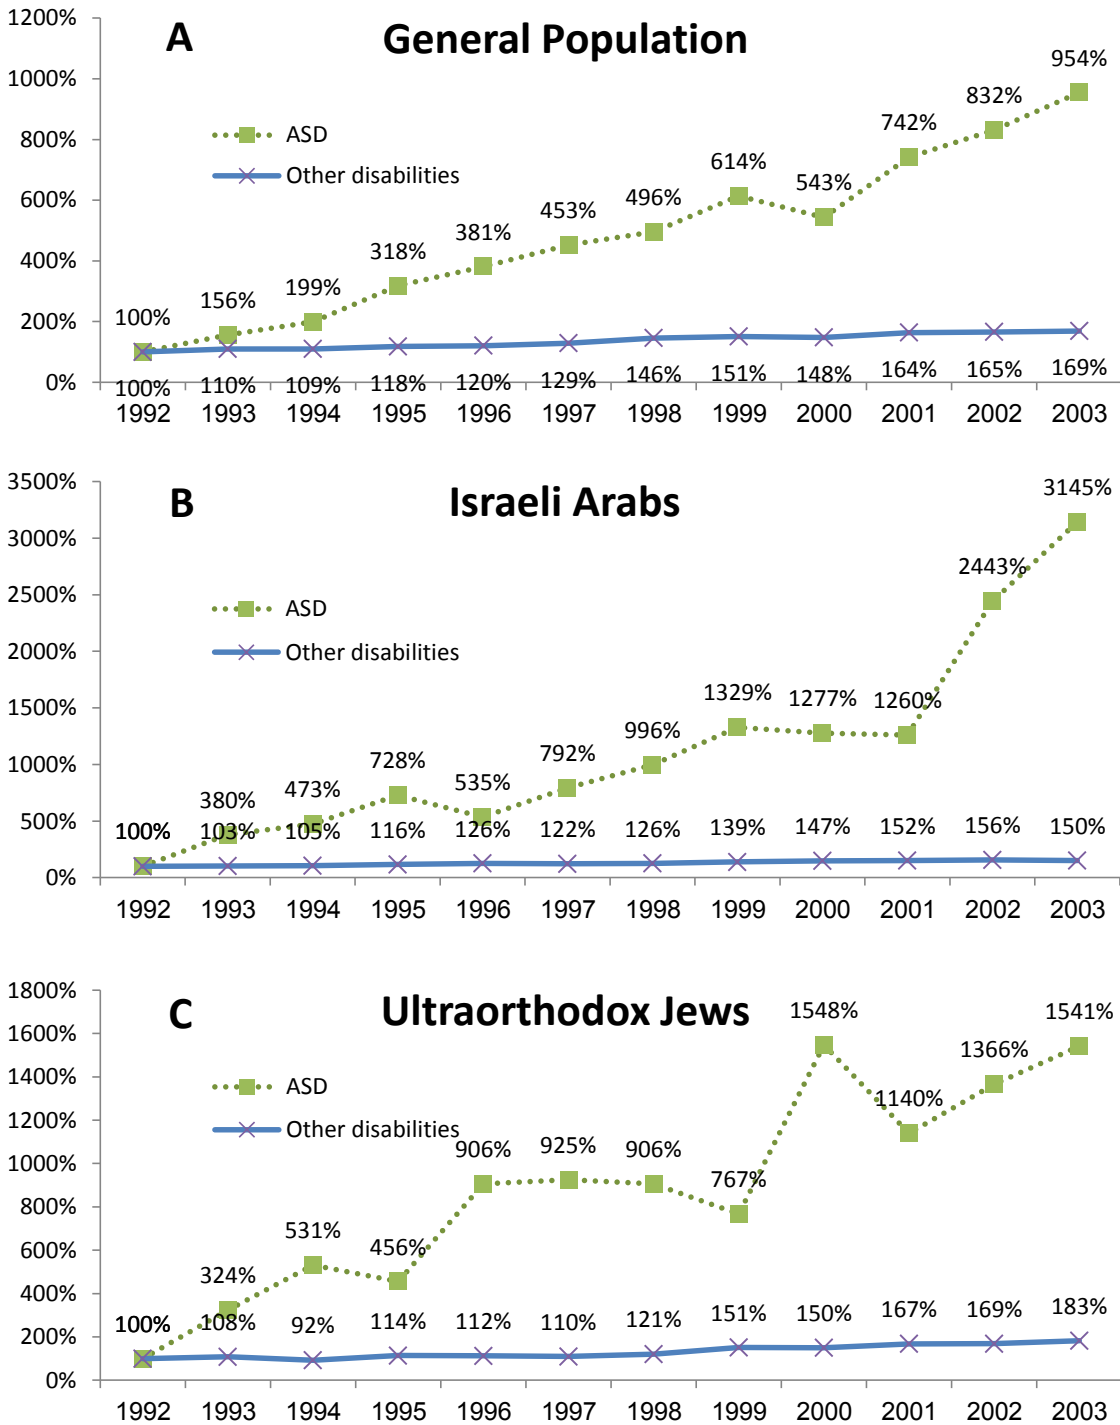

X axes represent birth year, Y axes represent percentage of 1992 cumulative incidence. Note that the Y axes are not in the same scale. General Population: Total population excluding Israeli Arabs and ultraorthodox Jews.
