# Supplementary material
Source: PubMed Central journal article supplement (PMC4369159)
Supplement: NIHMS633652-supplement-10803_2014_2262_MOESM2_ESM.pdf [file NIHMS633652-supplement-10803_2014_2262_MOESM2_ESM.pdf]

# Cumulative incidence of autism spectrum disorders in the Israeli population born 1992-2009, by birth cohort and population group

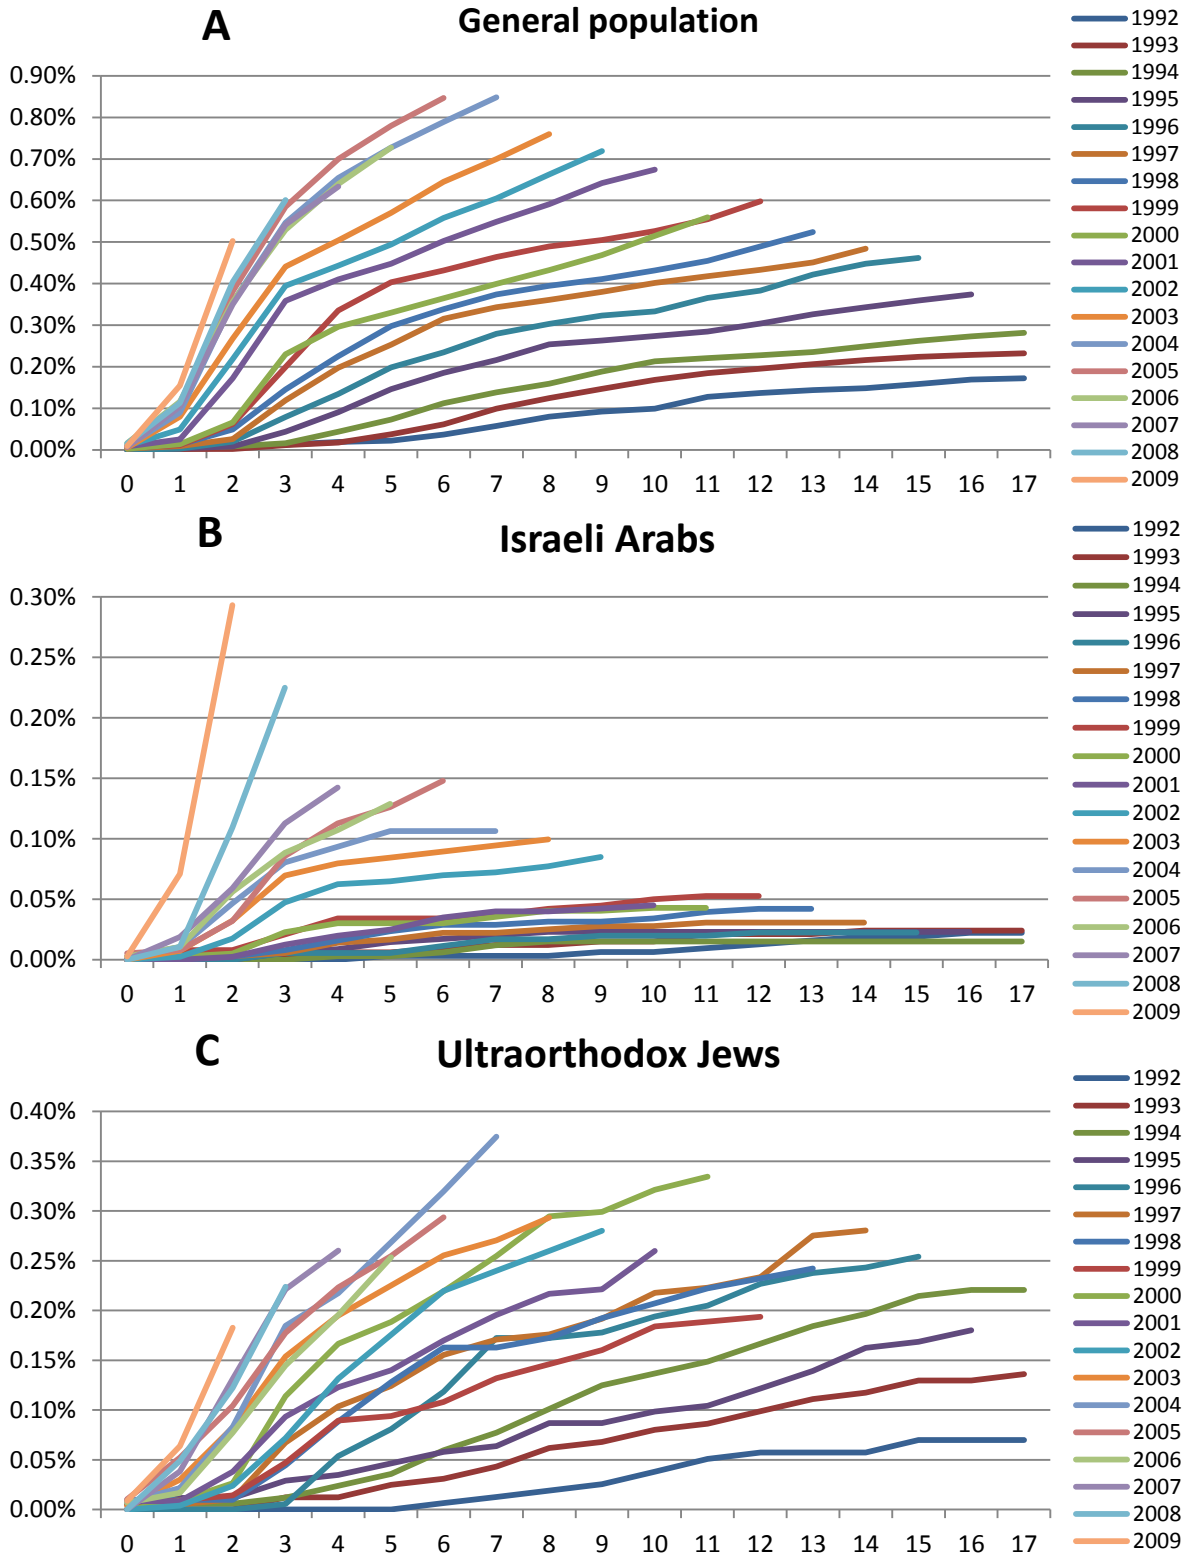

X axes represent cohort age (in years), Y axes represent cumulative incidence. Different lines represent different birth cohorts. Note that the Y axes are not in the same scale. General Population: Total population excluding Israeli Arabs and ultraorthodox Jews.
